# Supplementary material for: A fluoride selective water-soluble anion receptor based on a 1,2-phenylenediacetic acid and calcium ion dimer
Source: Royal Society of Chemistry journal article supplement (doi:10.1039/c9nj01436e), 2019-01-01
Supplement: c9nj01436e1.pdf [file c9nj01436e1.pdf]

## *Supporting information* of

### **A fluoride selective water-soluble anion receptor based on 1,2-Phenylenediacetic acid and calcium ion dimer.**

Dae Hyup Sohn, Nayeon Kim, Soonmin Jang,\*Jongmin Kang<sup>a,\*</sup>

*Department of Chemistry, Sejong University, Seoul 143-747, South Korea*

## Contents

|                                                                                                                                                                                                           |           |
|-----------------------------------------------------------------------------------------------------------------------------------------------------------------------------------------------------------|-----------|
| 1. General information .....                                                                                                                                                                              | (page S2) |
| 2. Determination of association constants .....                                                                                                                                                           | (page S3) |
| <b>Figure S1.</b> <sup>1</sup> H NMR spectrum of receptor <b>1</b> .....                                                                                                                                  | (page S4) |
| <b>Figure S2.</b> <sup>13</sup> C NMR spectrum of receptor <b>1</b> .....                                                                                                                                 | (page S4) |
| <b>Figure S3.</b> ESI-MS spectrum of receptor <b>1</b> .....                                                                                                                                              | (page S5) |
| <b>Figure S4.</b> <sup>1</sup> H NMR spectra of 2 mM of receptor <b>1</b> increasing amounts of tetrabutylammonium fluoride in 100 % D <sub>2</sub> O .....                                               | (page S5) |
| <b>Figure S5.</b> Family of UV-vis spectra recorded over the course of titration of 20 μM D <sub>2</sub> O solution of the receptor <b>1</b> with the standard solution tetrabutylammonium fluoride ..... | (page S5) |
| <b>Figure S6.</b> <sup>1</sup> H NMR spectra of 2 mM of receptor <b>1</b> increasing amounts of sodium fluoride in 100 % D <sub>2</sub> O .....                                                           | (page S6) |
| <b>Figure S7.</b> Family of UV-vis spectra recorded over the course of titration of 20 μM D <sub>2</sub> O solution of the receptor <b>1</b> with the standard solution sodium fluoride .....             | (page S6) |
| <b>Figure S8.</b> <sup>1</sup> H NMR spectra of 2 mM of receptor <b>1</b> increasing amounts of CaCl <sub>2</sub> in 100 % D <sub>2</sub> O .....                                                         | (page S7) |
| <b>Figure S9.</b> <sup>1</sup> H NMR spectra of 2 mM of receptor <b>1</b> increasing amounts of CaBr <sub>2</sub> in D <sub>2</sub> O .....                                                               | (page S7) |
| <b>Figure S10.</b> <sup>1</sup> H NMR spectra of 2 mM of receptor <b>1</b> increasing amounts of CaI <sub>2</sub> in D <sub>2</sub> O .....                                                               | (page S7) |

|                                                                                                                                                                 |            |
|-----------------------------------------------------------------------------------------------------------------------------------------------------------------|------------|
| .....                                                                                                                                                           | (page S7)  |
| <b>Figure S11.</b> $^1\text{H}$ NMR spectra of 2 mM of receptor <b>1</b> increasing amounts of monocalcium phosphate in $\text{D}_2\text{O}$ .....              | (page S8)  |
| <b>Figure S12.</b> Job's plot of receptor <b>1</b> with dihydrogen phosphate obtained by $^1\text{H}$ NMR in $\text{D}_2\text{O}$ .....                         | (page S8)  |
| <b>Figure S13.</b> $^1\text{H}$ NMR spectra of 2 mM of receptor <b>1</b> increasing amounts of tetrabutylammonium cyanide in $\text{D}_2\text{O}$ .....         | (page S8)  |
| <b>Figure S14.</b> $^1\text{H}$ NMR spectra of 2 mM of receptor <b>1</b> increasing amounts of tetrabutylammonium nitrate in $\text{D}_2\text{O}$ .....         | (page S9)  |
| <b>Figure S15.</b> $^1\text{H}$ NMR spectra of 2 mM of receptor <b>1</b> increasing amounts of tetrabutylammonium perchlorate in $\text{D}_2\text{O}$ .....     | (page S9)  |
| 3. Detailed structural information of complexes obtained from electronic structure calculations (structure files including atomic charges in mol2 format) ..... | (page S10) |

## 1. General information

Absorption spectra were recorded using biochrom Libra S70 spectrophotometer (Biochrom Ltd, England). NMR spectra were recorded using a BRUKER spectrometer operated at 500 MHz. ESI-MS spectrum was obtained using ESI Q-TOF Mass Spectrometer (Model : compact / Company : Bruker) at Sogang University. All measurements were carried out at room temperature (298 K). Calcium fluoride, tetrabutylammonium fluoride, calcium chloride, calcium bromide, and calcium iodide were purchased from Sigma Aldrich Chemical Co., Inc., and used as received.

## 2. Determination of association constants

We calculated association constants using non-linear regression method. Validity of the quantity of binding affinity is verified in regression coefficient by least square method.

(Thordarson, P. *Chem. Soc. Rev.*, **2011**, 40, 1305–1323.)

### a. UV-vis Spectroscopy

$$\Delta A = \frac{1 + aK_a + xK_a - \sqrt{-4axK_a^2 + (-1 - aK_a - xK_a)^2}}{2K_a} \Delta \varepsilon$$

where  $\Delta A$  (measured change in absorbance relative to the initial solution) is the y variable; x is concentration of anion added;  $a$  is the initial concentration of receptor (held constant over the course of titration);  $\Delta \varepsilon$  is the extinction coefficient difference between the free receptor and receptor-guest complex;  $K_a$  is the binding affinity of the receptor for the guest in question.

### b. NMR Spectroscopy

$$\Delta \delta = \frac{1 + aK_a + xK_a - \sqrt{-4axK_a^2 + (-1 - aK_a - xK_a)^2}}{2aK_a} \delta_{\Delta HG}$$

where  $\Delta \delta$  (measured change in chemical shift relative to the initial solution) is the y variable; x is concentration of anion added;  $a$  is the initial concentration of receptor (held constant over the course of titration);  $\delta_{\Delta HG}$  is the difference of chemical shift between the free receptor and receptor-guest complex;  $K_a$  is the binding affinity of the receptor for the guest in question.

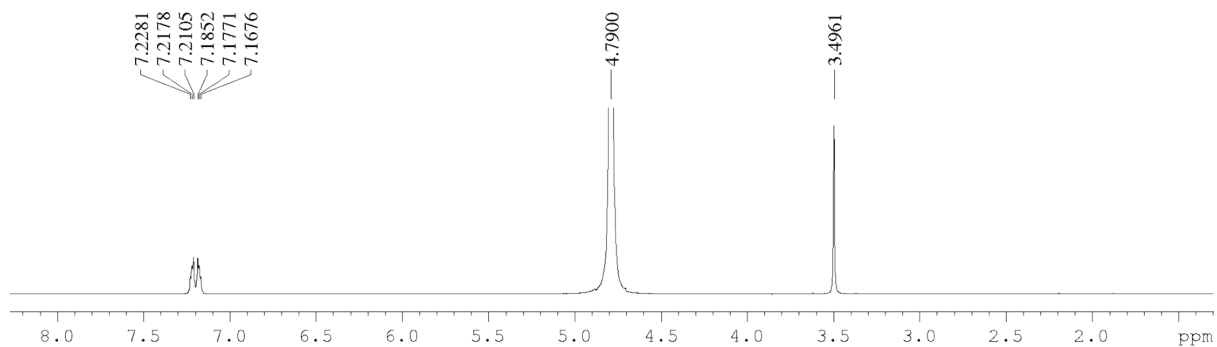

**Figure S1.**  $^1\text{H}$  NMR spectrum of receptor **1**.

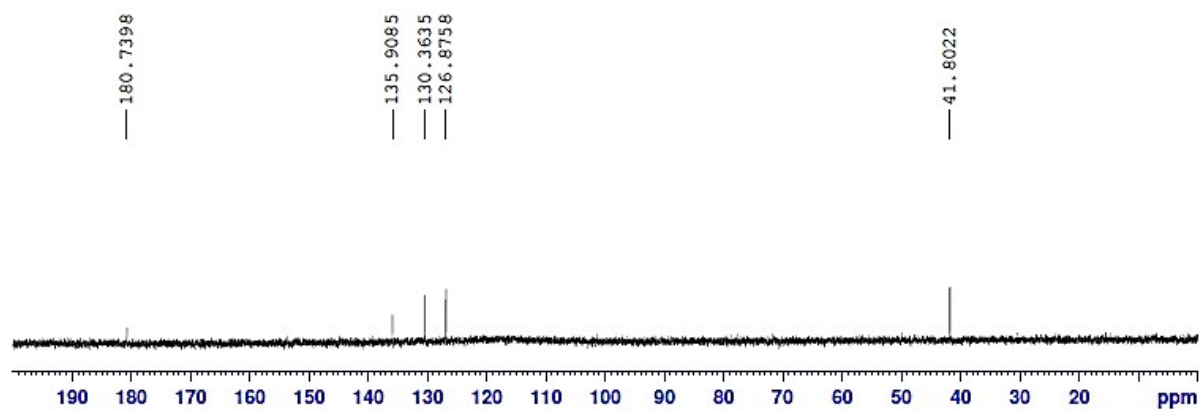

**Figure S2.**  $^{13}\text{C}$  NMR spectrum of receptor **1**.

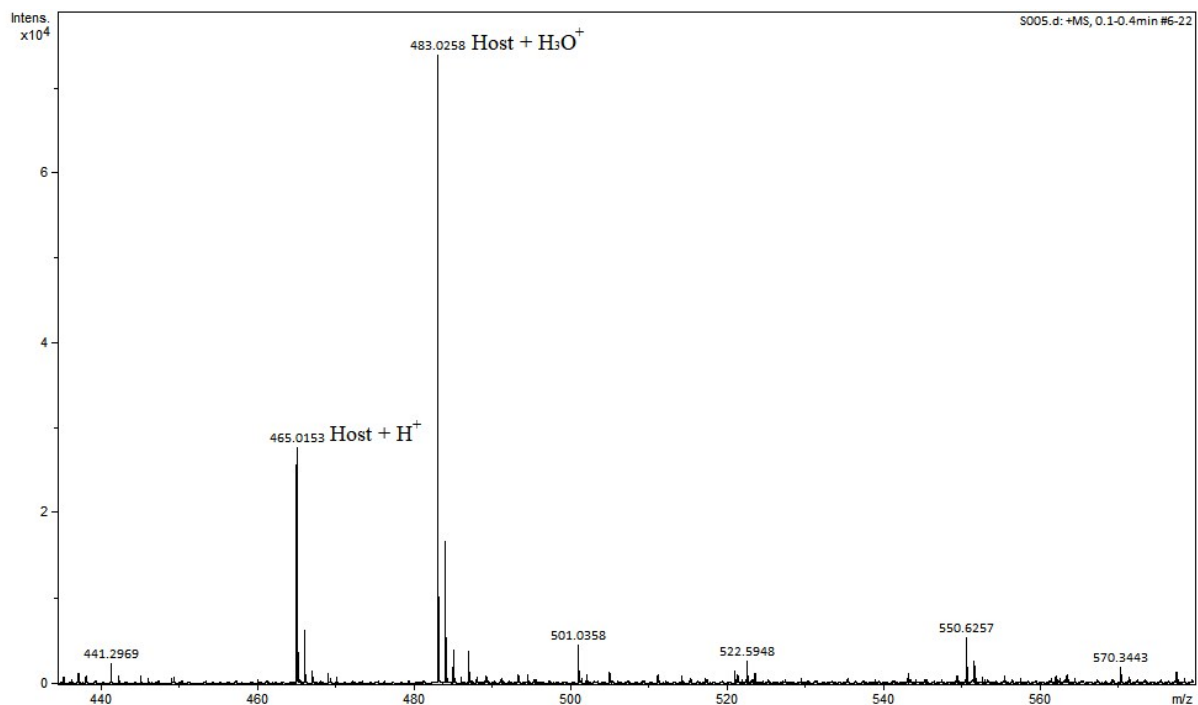

**Figure S3.** ESI-MS spectrum of receptor **1**.

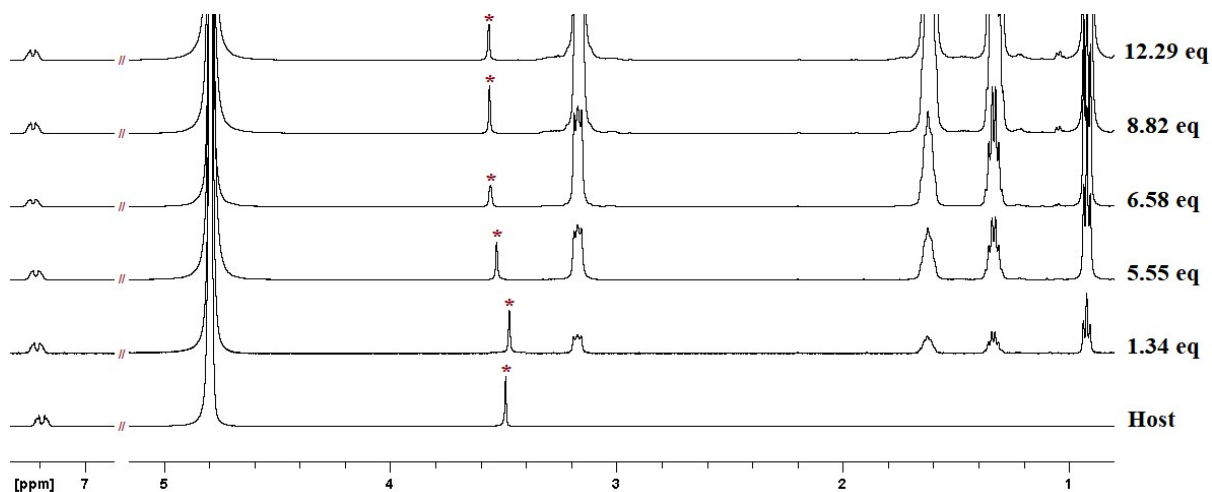

**Figure S4.**  $^1\text{H}$  NMR spectra of 2 mM of receptor **1** increasing amounts of tetrabutylammonium fluoride in 100 %  $\text{D}_2\text{O}$

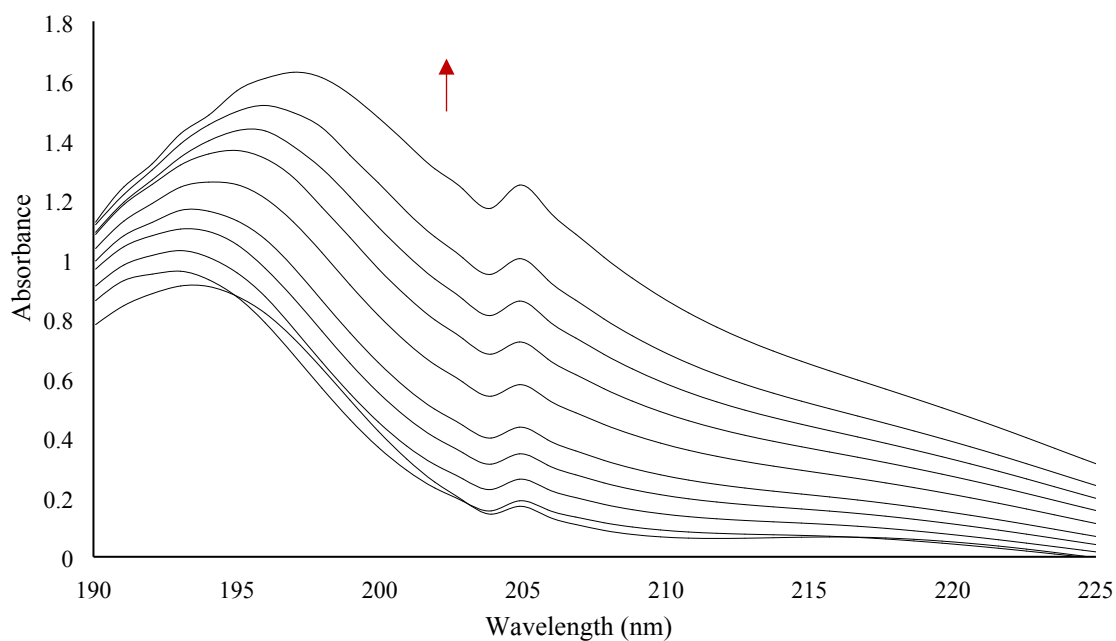

**Figure S5.** Family of UV-vis spectra recorded over the course of titration of 20  $\mu\text{M}$   $\text{D}_2\text{O}$  solution of the receptor **1** with the standard solution tetrabutylammonium fluoride

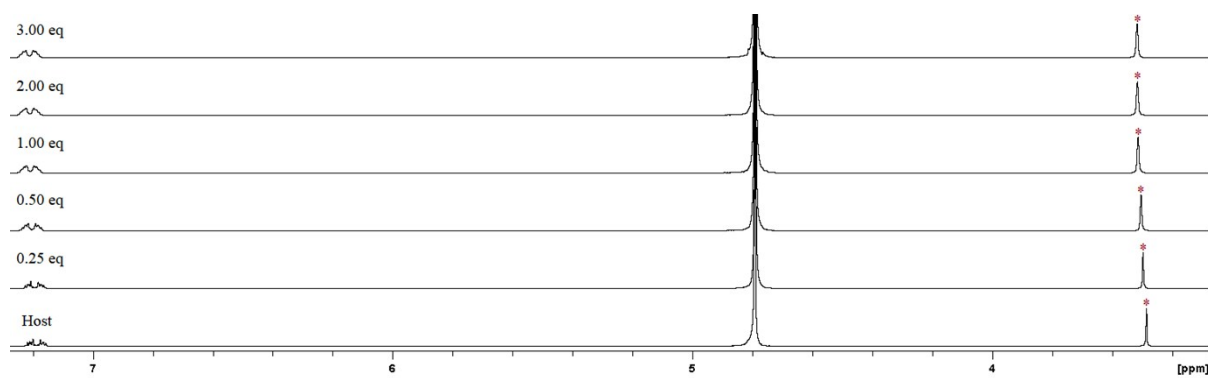

**Figure S6.** <sup>1</sup>H NMR spectra of 2 mM of receptor **1** increasing amounts of sodium fluoride in 100 % D<sub>2</sub>O

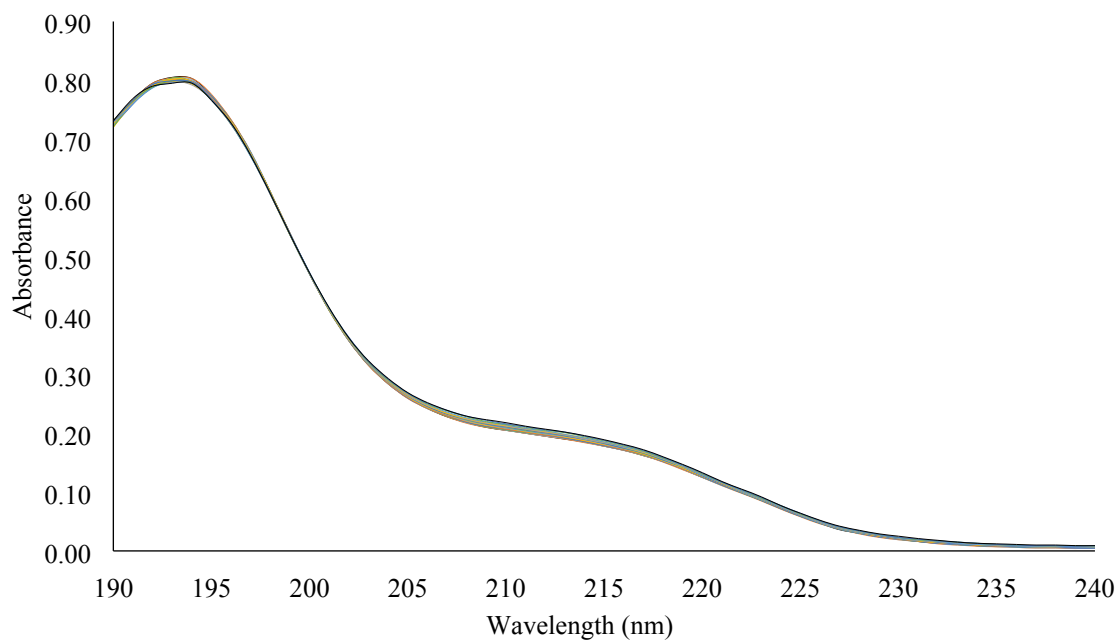

**Figure S7.** Family of UV-vis spectra recorded over the course of titration of 20 μM D<sub>2</sub>O solution of the receptor **1** with the standard solution sodium fluoride

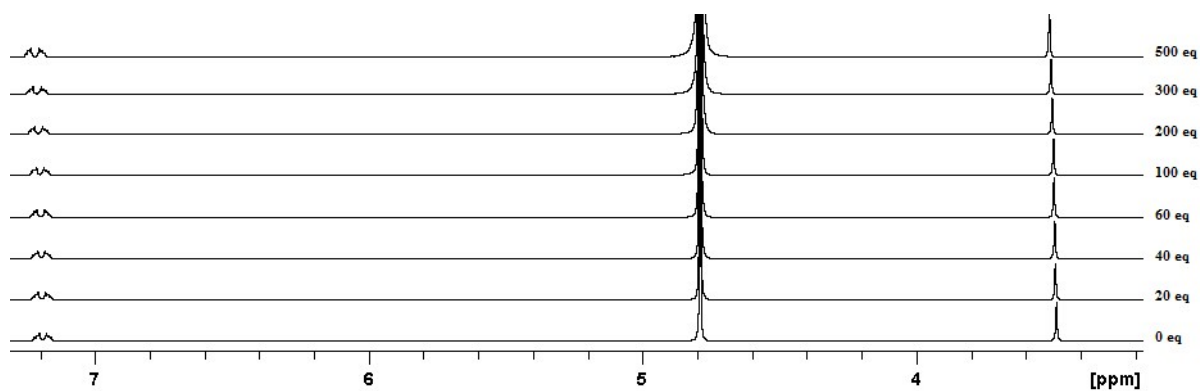

**Figure S8.** <sup>1</sup>H NMR spectra of 2 mM of receptor **1** amounts of CaCl<sub>2</sub> in 100 % D<sub>2</sub>O

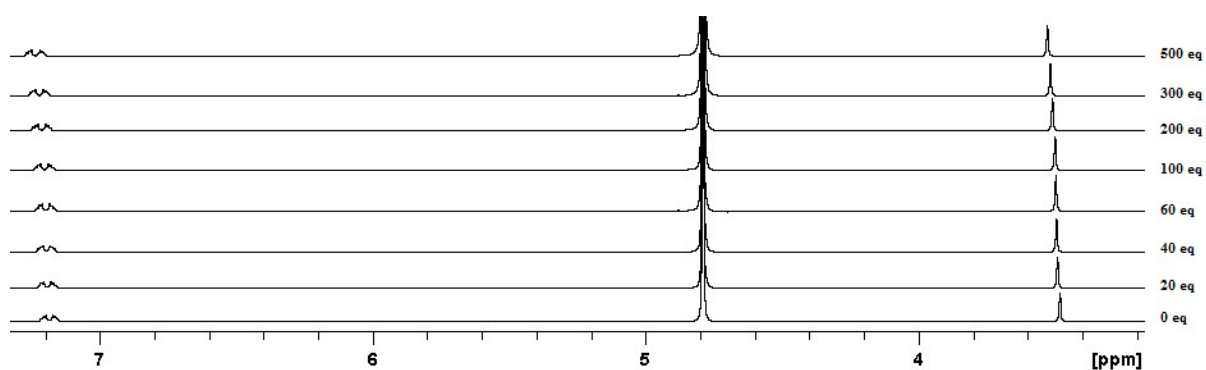

**Figure S9.** <sup>1</sup>H NMR spectra of 2 mM of receptor **1** increasing amounts of CaBr<sub>2</sub> in D<sub>2</sub>O

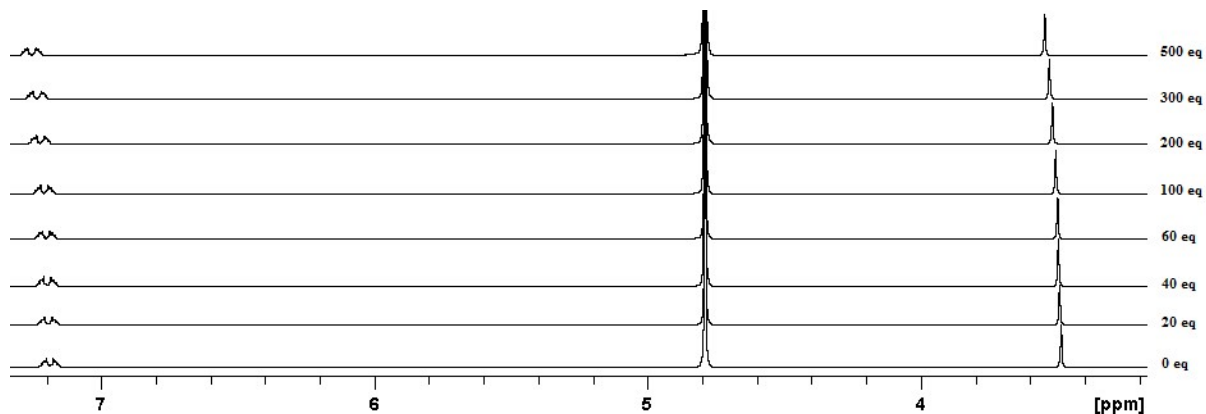

**Figure S10.** <sup>1</sup>H NMR spectra of 2 mM of receptor **1** increasing amounts of CaI<sub>2</sub> in D<sub>2</sub>O

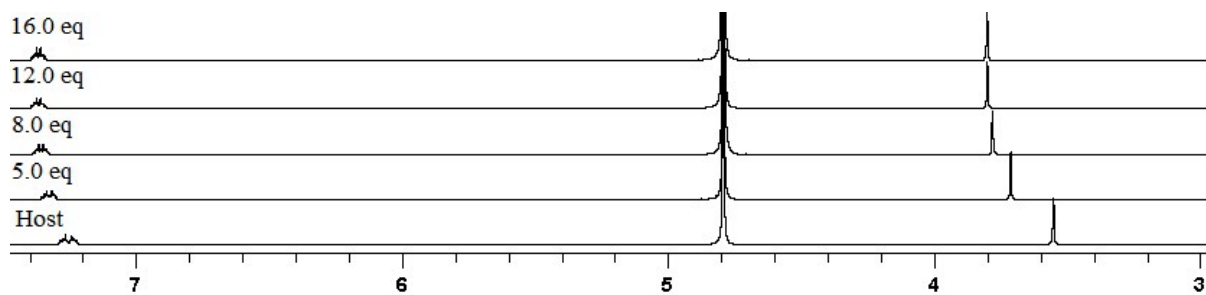

**Figure S11.**  $^1\text{H}$  NMR spectra of 2 mM of receptor **1** increasing amounts of monocalcium phosphate in  $\text{D}_2\text{O}$

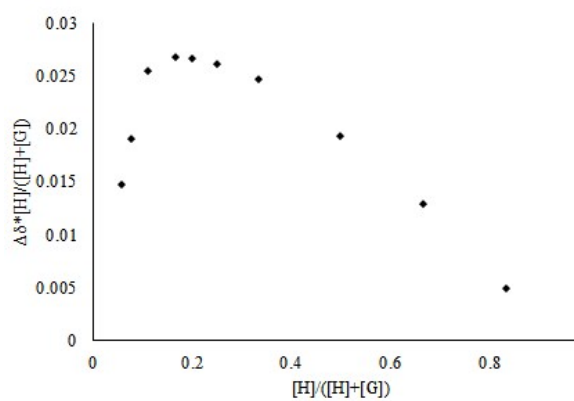

**Figure S12.** Job's plot of receptor **1** with dihydrogen phosphate obtained by  $^1\text{H}$  NMR in  $\text{D}_2\text{O}$ .

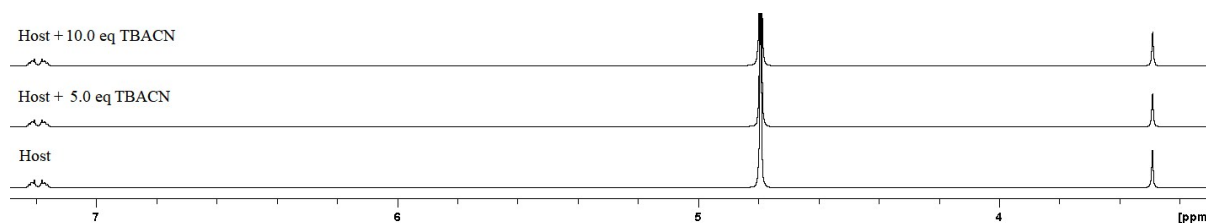

**Figure S13.**  $^1\text{H}$  NMR spectra of 2 mM of receptor **1** increasing amounts of tetrabutylammonium cyanide in  $\text{D}_2\text{O}$



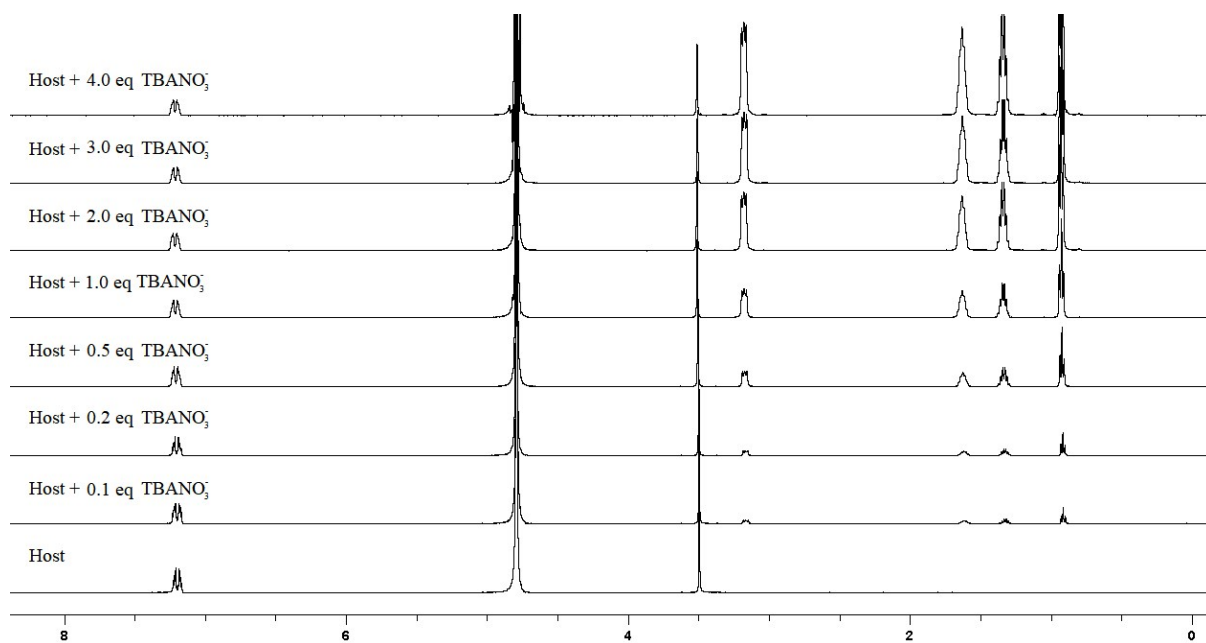

**Figure S14.**  $^1\text{H}$  NMR spectra of 2 mM of receptor **1** increasing amounts of tetrabutylammonium nitrate in  $\text{D}_2\text{O}$

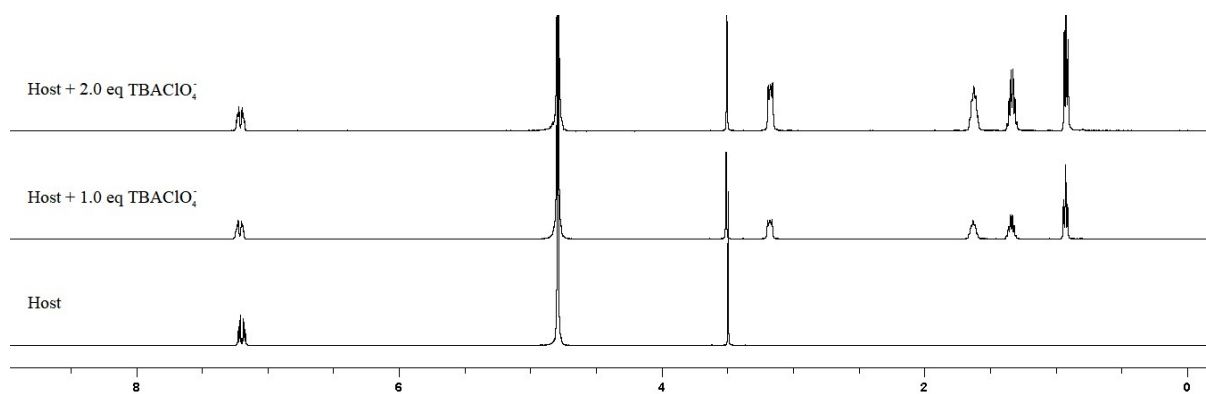

**Figure S15.**  $^1\text{H}$  NMR spectra of 2 mM of receptor **1** increasing amounts of tetrabutylammonium perchlorate in  $\text{D}_2\text{O}$

3. Detailed structural information of complexes including atomic charges obtained from electronic structure calculations (F<sup>-</sup>, Cl<sup>-</sup>, and Br<sup>-</sup> complex respectively). The assigned atomic charges are based on Mulliken population analysis.

@<TRIPOS>MOLECULE

generated by VMD

47 54 1 0 0

SMALL

CHARGES

\*\*\*\*

Energy = 0

@<TRIPOS>ATOM

|    |     |         |         |         |   |   |   |           |
|----|-----|---------|---------|---------|---|---|---|-----------|
| 1  | C1  | -4.5063 | 0.4290  | 1.0041  | C | 0 | 0 | 0.772000  |
| 2  | C2  | -4.8176 | -0.2623 | -0.1918 | C | 0 | 0 | 0.691000  |
| 3  | C3  | -6.1620 | -0.5601 | -0.4591 | C | 0 | 0 | -0.458000 |
| 4  | C4  | -7.1945 | -0.1924 | 0.4011  | C | 0 | 0 | -0.425000 |
| 5  | C5  | -6.8907 | 0.5059  | 1.5653  | C | 0 | 0 | -0.477000 |
| 6  | C6  | -5.5595 | 0.8011  | 1.8523  | C | 0 | 0 | -0.441000 |
| 7  | H7  | -6.4032 | -1.0879 | -1.3766 | H | 0 | 0 | 0.158000  |
| 8  | H8  | -8.2210 | -0.4431 | 0.1571  | H | 0 | 0 | 0.185000  |
| 9  | H9  | -7.6754 | 0.8132  | 2.2479  | H | 0 | 0 | 0.186000  |
| 10 | H10 | -5.3234 | 1.3305  | 2.7702  | H | 0 | 0 | 0.155000  |
| 11 | C11 | -3.0996 | 0.7015  | 1.4957  | C | 0 | 0 | -0.110000 |
| 12 | H12 | -3.1425 | 1.0536  | 2.5292  | H | 0 | 0 | 0.240000  |
| 13 | H13 | -2.5541 | -0.2466 | 1.5177  | H | 0 | 0 | 0.245000  |

S10

|    |     |         |         |         |   |   |   |           |
|----|-----|---------|---------|---------|---|---|---|-----------|
| 14 | C14 | -3.8128 | -0.6121 | -1.2710 | C | 0 | 0 | -0.196000 |
| 15 | H15 | -4.3481 | -0.9073 | -2.1755 | H | 0 | 0 | 0.236000  |
| 16 | H16 | -3.2554 | 0.2951  | -1.5275 | H | 0 | 0 | 0.252000  |
| 17 | C17 | -2.1616 | 1.6550  | 0.7540  | C | 0 | 0 | -0.496000 |
| 18 | O18 | -1.0532 | 1.8941  | 1.3308  | O | 0 | 0 | -0.364000 |
| 19 | O19 | -2.4266 | 2.1058  | -0.3954 | O | 0 | 0 | -0.415000 |
| 20 | C20 | -2.7220 | -1.6612 | -1.0435 | C | 0 | 0 | -0.430000 |
| 21 | O21 | -2.3566 | -1.9991 | 0.1192  | O | 0 | 0 | -0.395000 |
| 22 | O22 | -2.1257 | -2.0803 | -2.0827 | O | 0 | 0 | -0.402000 |
| 23 | C23 | 7.1945  | 0.1925  | 0.4010  | C | 0 | 0 | -0.425000 |
| 24 | C24 | 6.8907  | -0.5062 | 1.5650  | C | 0 | 0 | -0.447000 |
| 25 | C25 | 5.5596  | -0.8016 | 1.8519  | C | 0 | 0 | -0.441000 |
| 26 | C26 | 4.5063  | -0.4293 | 1.0038  | C | 0 | 0 | 0.772000  |
| 27 | C27 | 4.8176  | 0.2624  | -0.1919 | C | 0 | 0 | 0.691000  |
| 28 | C28 | 6.1619  | 0.5604  | -0.4591 | C | 0 | 0 | -0.458000 |
| 29 | H29 | 8.2210  | 0.4433  | 0.1571  | H | 0 | 0 | 0.185000  |
| 30 | H30 | 7.6754  | -0.8136 | 2.2475  | H | 0 | 0 | 0.186000  |
| 31 | H31 | 5.3235  | -1.3312 | 2.7696  | H | 0 | 0 | 0.155000  |
| 32 | H32 | 6.4031  | 1.0884  | -1.3764 | H | 0 | 0 | 0.158000  |
| 33 | C33 | 3.8127  | 0.6125  | -1.2709 | C | 0 | 0 | -0.196000 |
| 34 | H34 | 4.3480  | 0.9079  | -2.1754 | H | 0 | 0 | 0.236000  |
| 35 | H35 | 3.2553  | -0.2946 | -1.5276 | H | 0 | 0 | 0.252000  |
| 36 | C36 | 3.0997  | -0.7020 | 1.4954  | C | 0 | 0 | -0.110000 |
| 37 | H37 | 3.1426  | -1.0543 | 2.5287  | H | 0 | 0 | 0.240000  |
| 38 | H38 | 2.5540  | 0.2460  | 1.5175  | H | 0 | 0 | 0.245000  |

|    |      |         |         |         |    |   |   |           |
|----|------|---------|---------|---------|----|---|---|-----------|
| 39 | C39  | 2.7219  | 1.6615  | -1.0432 | C  | 0 | 0 | 0.430000  |
| 40 | O40  | 2.1256  | 2.0810  | -2.0822 | O  | 0 | 0 | -0.402000 |
| 41 | O41  | 2.3565  | 1.9991  | 0.1197  | O  | 0 | 0 | -0.395000 |
| 42 | C42  | 2.1618  | -1.6555 | 0.7534  | C  | 0 | 0 | -0.495000 |
| 43 | O43  | 1.0535  | -1.8952 | 1.3303  | O  | 0 | 0 | 0.364000  |
| 44 | O44  | 2.4266  | -2.1057 | -0.3962 | O  | 0 | 0 | -0.415000 |
| 45 | Ca45 | -0.0508 | -2.1791 | -0.7822 | Ca | 0 | 0 | 1.258000  |
| 46 | Ca46 | 0.0508  | 2.1793  | -0.7817 | Ca | 0 | 0 | 1.258000  |
| 47 | F47  | 0.0000  | 0.0002  | -1.0921 | F  | 0 | 0 | -0.535000 |

@<TRIPOS>BOND

|    |    |    |   |
|----|----|----|---|
| 1  | 1  | 2  | 1 |
| 2  | 1  | 6  | 1 |
| 3  | 1  | 11 | 1 |
| 4  | 2  | 3  | 1 |
| 5  | 2  | 14 | 1 |
| 6  | 3  | 4  | 1 |
| 7  | 3  | 7  | 1 |
| 8  | 4  | 5  | 1 |
| 9  | 4  | 8  | 1 |
| 10 | 5  | 6  | 1 |
| 11 | 5  | 9  | 1 |
| 12 | 6  | 10 | 1 |
| 13 | 11 | 12 | 1 |
| 14 | 11 | 13 | 1 |

|    |    |    |   |
|----|----|----|---|
| 15 | 11 | 17 | 1 |
| 16 | 14 | 15 | 1 |
| 17 | 14 | 16 | 1 |
| 18 | 14 | 20 | 1 |
| 19 | 17 | 18 | 2 |
| 20 | 17 | 19 | 2 |
| 21 | 18 | 46 | 1 |
| 22 | 19 | 46 | 1 |
| 23 | 20 | 21 | 2 |
| 24 | 20 | 22 | 2 |
| 25 | 21 | 45 | 1 |
| 26 | 22 | 45 | 1 |
| 27 | 23 | 24 | 1 |
| 28 | 23 | 28 | 1 |
| 29 | 23 | 29 | 1 |
| 30 | 24 | 25 | 1 |
| 31 | 24 | 30 | 1 |
| 32 | 25 | 26 | 1 |
| 33 | 25 | 31 | 1 |
| 34 | 26 | 27 | 1 |
| 35 | 26 | 36 | 1 |
| 36 | 27 | 28 | 1 |
| 37 | 27 | 33 | 1 |
| 38 | 28 | 32 | 1 |
| 39 | 33 | 34 | 1 |

```
40 33 35 1
41 33 39 1
42 36 37 1
43 36 38 1
44 36 42 1
45 39 40 2
46 39 41 2
47 40 46 1
48 41 46 1
49 42 43 2
50 42 44 2
51 43 45 1
52 44 45 1
53 45 47 1
54 46 47 1
```

@<TRIPOS>SUBSTRUCTURE

1 \*\*\*\*

1 TEMP

0 \*\*\*\* \*\*\*\* 0 ROOT

@<TRIPOS>MOLECULE

generated by VMD

```
47 0 1 0 0
```

SMALL

CHARGES

\*\*\*\*

Energy = 0

@<TRIPOS>ATOM

|    |   |        |         |         |   |   |           |
|----|---|--------|---------|---------|---|---|-----------|
| 1  | C | 3.4680 | -1.4800 | -0.9490 | C | 0 | 0.662000  |
| 2  | C | 4.1200 | -0.8590 | 0.1380  | C | 0 | 0.419000  |
| 3  | C | 5.2630 | -1.4550 | 0.6790  | C | 0 | -0.418000 |
| 4  | C | 5.7750 | -2.6460 | 0.1660  | C | 0 | -0.442000 |
| 5  | C | 5.1380 | -3.2580 | -0.9100 | C | 0 | -0.392000 |
| 6  | C | 3.9940 | -2.6740 | -1.4540 | C | 0 | -0.213000 |
| 7  | H | 5.7630 | -0.9740 | 1.5140  | H | 0 | 0.176000  |
| 8  | H | 6.6640 | -3.0880 | 0.6040  | H | 0 | 0.189000  |
| 9  | H | 5.5230 | -4.1830 | -1.3230 | H | 0 | 0.191000  |
| 10 | H | 3.4960 | -3.1550 | -2.2900 | H | 0 | 0.168000  |
| 11 | C | 2.2090 | -0.9000 | -1.5570 | C | 0 | -0.407000 |
| 12 | H | 1.8050 | -1.6140 | -2.2810 | H | 0 | 0.248000  |
| 13 | H | 1.4380 | -0.7650 | -0.7950 | H | 0 | -0.073000 |
| 14 | C | 3.6280 | 0.4560  | 0.7060  | C | 0 | -0.371000 |
| 15 | H | 4.3500 | 0.8220  | 1.4430  | H | 0 | 0.221000  |
| 16 | H | 3.5630 | 1.2220  | -0.0690 | H | 0 | 0.284000  |
| 17 | C | 2.3900 | 0.4330  | -2.3280 | C | 0 | -0.109000 |
| 18 | O | 1.5250 | 1.3460  | -2.0880 | O | 0 | -0.395000 |
| 19 | O | 3.3210 | 0.5260  | -3.1440 | O | 0 | -0.432000 |

S15

|    |   |         |         |         |   |   |           |
|----|---|---------|---------|---------|---|---|-----------|
| 20 | C | 2.2850  | 0.4020  | 1.4300  | C | 0 | -0.175000 |
| 21 | O | 1.4540  | 1.3590  | 1.2410  | O | 0 | -0.356000 |
| 22 | O | 2.0170  | -0.5380 | 2.2160  | O | 0 | -0.339000 |
| 23 | C | -5.8420 | -1.0450 | -2.0810 | C | 0 | -0.449000 |
| 24 | C | -5.2380 | -2.2940 | -2.1880 | C | 0 | -0.382000 |
| 25 | C | -4.1010 | -2.5750 | -1.4300 | C | 0 | -0.231000 |
| 26 | C | -3.5490 | -1.6310 | -0.5580 | C | 0 | 0.583000  |
| 27 | C | -4.1660 | -0.3660 | -0.4470 | C | 0 | 0.463000  |
| 28 | C | -5.3040 | -0.0950 | -1.2130 | C | 0 | -0.129000 |
| 29 | H | -6.7260 | -0.8090 | -2.6640 | H | 0 | 0.189000  |
| 30 | H | -5.6430 | -3.0460 | -2.8560 | H | 0 | 0.192000  |
| 31 | H | -3.6280 | -3.5480 | -1.5180 | H | 0 | 0.167000  |
| 32 | H | -5.7780 | 0.8770  | -1.1250 | H | 0 | 0.176000  |
| 33 | C | -3.6410 | 0.6880  | 0.5050  | C | 0 | -0.310000 |
| 34 | H | -4.3420 | 1.5280  | 0.5320  | H | 0 | 0.221000  |
| 35 | H | -3.5770 | 0.3020  | 1.5240  | H | 0 | 0.278000  |
| 36 | C | -2.2980 | -1.9750 | 0.2220  | C | 0 | -0.425000 |
| 37 | H | -1.9310 | -2.9510 | -0.1100 | H | 0 | 0.243000  |
| 38 | H | -1.5030 | -1.2580 | 0.0100  | H | 0 | -0.102000 |
| 39 | C | -2.2840 | 1.2880  | 0.1370  | C | 0 | -0.227000 |
| 40 | O | -2.0420 | 1.6420  | -1.0390 | O | 0 | -0.308000 |
| 41 | O | -1.4180 | 1.4480  | 1.0690  | O | 0 | -0.339000 |
| 42 | C | -2.4780 | -2.0840 | 1.7570  | C | 0 | -0.082000 |
| 43 | O | -1.5980 | -1.4880 | 2.4720  | O | 0 | -0.419000 |
| 44 | O | -3.4220 | -2.7550 | 2.2010  | O | 0 | -0.432000 |



|    |    |         |        |         |    |   |           |
|----|----|---------|--------|---------|----|---|-----------|
| 45 | Ca | -0.2360 | 0.2900 | 2.7340  | Ca | 0 | 1.356000  |
| 46 | Ca | 0.2650  | 2.4070 | -0.5210 | Ca | 0 | 1.038000  |
| 47 | Cl | 0.2980  | 5.1070 | -0.1200 | Cl | 0 | -0.775000 |

@<TRIPOS>SUBSTRUCTURE

1 \*\*\*\* 1 TEMP 0 \*\*\*\* \*\*\*\* 0 ROOT

@<TRIPOS>MOLECULE

generated by VMD

47 0 1 0 0

SMALL

CHARGES

\*\*\*\*

Energy = 0

@<TRIPOS>ATOM

|    |   |         |         |         |   |   |           |
|----|---|---------|---------|---------|---|---|-----------|
| 1  | C | -4.5070 | -1.4860 | -0.6340 | C | 0 | -0.028000 |
| 2  | C | -4.7730 | -0.2080 | -0.0890 | C | 0 | 0.236000  |
| 3  | C | -6.0720 | 0.3070  | -0.1910 | C | 0 | 0.031000  |
| 4  | C | -7.1080 | -0.4050 | -0.7920 | C | 0 | -0.511000 |
| 5  | C | -6.8530 | -1.6720 | -1.3070 | C | 0 | -0.507000 |
| 6  | C | -5.5630 | -2.1920 | -1.2260 | C | 0 | -0.123000 |
| 7  | H | -6.2770 | 1.2900  | 0.2210  | H | 0 | 0.182000  |
| 8  | H | -8.1010 | 0.0280  | -0.8520 | H | 0 | 0.187000  |
| 9  | H | -7.6440 | -2.2490 | -1.7730 | H | 0 | 0.189000  |
| 10 | H | -5.3630 | -3.1740 | -1.6430 | H | 0 | 0.157000  |
| 11 | C | -3.1270 | -2.1030 | -0.7170 | C | 0 | 0.000000  |
| 12 | H | -3.2000 | -3.0810 | -1.2040 | H | 0 | 0.236000  |
| 13 | H | -2.4960 | -1.5050 | -1.3830 | H | 0 | 0.236000  |
| 14 | C | -3.7730 | 0.6050  | 0.7170  | C | 0 | 0.164000  |
| 15 | H | -4.2010 | 1.5980  | 0.8860  | H | 0 | 0.189000  |
| 16 | H | -3.6450 | 0.1330  | 1.6900  | H | 0 | 0.236000  |

S18

|    |   |         |         |         |   |   |           |
|----|---|---------|---------|---------|---|---|-----------|
| 17 | C | -2.2940 | -2.3140 | 0.5490  | C | 0 | -0.387000 |
| 18 | O | -1.0700 | -2.6150 | 0.3600  | O | 0 | -0.323000 |
| 19 | O | -2.7660 | -2.1230 | 1.6990  | O | 0 | -0.390000 |
| 20 | C | -2.3790 | 0.8630  | 0.1500  | C | 0 | -0.459000 |
| 21 | O | -1.3740 | 0.5490  | 0.8870  | O | 0 | -0.294000 |
| 22 | O | -2.2130 | 1.4290  | -0.9520 | O | 0 | -0.340000 |
| 23 | C | 6.8880  | -1.7560 | -0.0830 | C | 0 | -0.506000 |
| 24 | C | 6.5280  | -2.2330 | -1.3390 | C | 0 | -0.518000 |
| 25 | C | 5.2170  | -2.0650 | -1.7800 | C | 0 | -0.110000 |
| 26 | C | 4.2410  | -1.4230 | -1.0050 | C | 0 | 0.003000  |
| 27 | C | 4.6140  | -0.9200 | 0.2640  | C | 0 | 0.162000  |
| 28 | C | 5.9330  | -1.1080 | 0.6980  | C | 0 | 0.003000  |
| 29 | H | 7.8980  | -1.8820 | 0.2890  | H | 0 | 0.187000  |
| 30 | H | 7.2530  | -2.7350 | -1.9690 | H | 0 | 0.188000  |
| 31 | H | 4.9340  | -2.4520 | -2.7540 | H | 0 | 0.170000  |
| 32 | H | 6.2200  | -0.7260 | 1.6730  | H | 0 | 0.183000  |
| 33 | C | 3.7130  | -0.0760 | 1.1500  | C | 0 | 0.150000  |
| 34 | H | 4.1960  | 0.0290  | 2.1270  | H | 0 | 0.191000  |
| 35 | H | 3.6320  | 0.9220  | 0.7200  | H | 0 | 0.223000  |
| 36 | C | 2.8250  | -1.4160 | -1.5420 | C | 0 | -0.061000 |
| 37 | H | 2.8200  | -1.8630 | -2.5410 | H | 0 | 0.227000  |
| 38 | H | 2.1990  | -2.0760 | -0.9340 | H | 0 | 0.231000  |
| 39 | C | 2.2980  | -0.5550 | 1.4530  | C | 0 | -0.301000 |
| 40 | O | 2.0750  | -1.7080 | 1.8910  | O | 0 | -0.378000 |
| 41 | O | 1.3440  | 0.2880  | 1.3010  | O | 0 | -0.329000 |

|    |    |         |         |         |    |   |           |
|----|----|---------|---------|---------|----|---|-----------|
| 42 | C  | 2.0450  | -0.1030 | -1.6580 | C  | 0 | -0.318000 |
| 43 | O  | 0.7940  | -0.2180 | -1.8610 | O  | 0 | -0.295000 |
| 44 | O  | 2.5960  | 1.0160  | -1.4910 | O  | 0 | -0.356000 |
| 45 | Ca | 0.3450  | 1.6360  | -0.4370 | Ca | 0 | 1.138000  |
| 46 | Ca | -0.3960 | -1.2140 | 2.1430  | Ca | 0 | 1.290000  |
| 47 | Br | 0.5890  | 4.5120  | 0.0840  | Br | 0 | -0.864000 |

@<TRIPOS>SUBSTRUCTURE

1 \*\*\*\*

1 TEMP

0 \*\*\*\* \*\*\*\* 0 ROOT
